# Supplementary material
Source: Research Square preprint supplement (doi:10.21203/rs.3.rs-8991408/v1)
Supplement: Supplementary file 1 [file 3f09ddcc8f9344523bf735cd.docx]

**SUPPLEMENTARY MATERIAL S2**

**Facilitator Flowcharts & Decision Guides**

*AI-Driven Social–Emotional Learning: Enhancing Perspective-Taking Skills*

*Through Scenario-Based Chatbot Dialogues in Early Childhood*

# **Purpose of This Document**

This document provides structured delivery guidance for facilitators across all 12 sessions. It contains: (1) the master 12-session implementation timeline, (2) the universal session flow applicable to every session, (3) a situational decision guide, and (4) a scaffolding ladder. All materials should be read alongside the Scenario Scripts (S1) and the Session Fidelity Checklist (S3).

**Interaction model.** A voice-activated, web-based generative AI chatbot was used. The chatbot spoke directly to the child and the child responded by speaking aloud. The facilitator was present for support, observation, and scaffolding — but was not the communication channel between child and chatbot.

# **Master Implementation Timeline**

One scenario was delivered per session across 12 sessions over six weeks (two sessions per week).

| **Ses.** | **Wk** | **Scenario** | **Theme** | **Target Skill** | **Facilitator Focus** |
| --- | --- | --- | --- | --- | --- |
| **1** | **1** | The New Friend | Inclusion & Loneliness | Emotion recognition + prosocial action | Establish rapport; note first engagement with chatbot voice |
| **2** | **1** | The Broken Toy | Misunderstanding & Apology | Dual-perspective; intentionality | Monitor dual-perspective attempts; note apology language |
| **3** | **2** | The Shared Snack | Fairness & Generosity | Fairness values; disappointment | Note fairness reasoning; record sharing proposals |
| **4** | **2** | The Surprise Party | Intentions & Consequences | Three-perspective; behaviour–meaning gap | Track whether child holds competing beliefs simultaneously |
| **5** | **3** | The Painting That Got Torn | Emotional Regulation & Forgiveness | Regulation strategy; causal attribution | Listen for regulation vocabulary; note self-correction |
| **6** | **3** | Left Out of the Game | Inclusion & Social Advocacy | Witness perspective; systemic repair | Note advocacy language and solution quality |
| **7** | **4** | The Mixed-Up Message | Miscommunication & Clarification | Ambiguity; clarification; repair | Observe whether child queries intent vs. assumes meaning |
| **8** | **4** | The Too-Loud Voice | Self-Regulation & Social Awareness | Self-monitoring; social impact | Record self-corrective strategies offered |
| **9** | **5** | The Forgotten Invitation | Hurt Feelings & Intentionality | Attribution; empathic inquiry | Track intentionality judgements; note inquiry language |
| **10** | **5** | The Different Idea | Perspective Differences & Compromise | Competing views; compromise | Note whether child validates the other view before proposing |
| **11** | **6** | The Broken Promise | Trust & Repair | Attribution; forgiveness; trust-repair | Observe complexity of forgiveness reasoning |
| **12** | **6** | The Last Day | Loss, Change & Transition | Mixed emotions; acceptance; reframing | Note positive reframing; document emotional vocabulary range |

# **Universal Session Flow**

The flow below applies to all 12 sessions. Only the scenario content changes each session.

| **Universal Session Flow**  Applies to all 12 sessions | 20–25 minutes per session | |
| --- | --- |
| **PRE-SESSION (5 minutes before child arrives)**  *Complete before the child enters the room* | |
| **✓** Confirm stable internet connection. Open and test the chatbot interface — confirm voice output is working.  **✓** Set device volume to an appropriate level for the room. Test that the microphone picks up normal child speech.  **✓** Have this session's fidelity checklist (S3) ready — paper or digital.  **✓** Review today's scenario script: narrative content, phase sequence, and scaffold prompts.  **✓** Arrange seating: child faces the device (tablet or laptop) at a comfortable distance. Facilitator sits to the side — present but not between child and device.  **✓** Remove distracting objects. Ensure the space is quiet and low-distraction. | |
| **▼ Child arrives** | |
| **STEP 1 — Welcome & Orientation (1–2 min)** | |
| Greet the child warmly by name.  **Say:** *"Today we're going to talk with our story friend again. Are you ready?"*  Direct the child's attention to the device. Confirm the chatbot interface is active. | |
| **▼ Child begins speaking with chatbot** | |
| **STEP 2 — Scenario Delivery (15–18 min)**  *Child and chatbot interact directly by voice* | |
| **During each turn in the scenario:**  **1.** Chatbot speaks its prompt aloud. Child listens.  **2.** Child responds by speaking directly to the chatbot. Chatbot processes the voice input.  **3.** Chatbot responds by voice and continues to the next prompt.  **Facilitator role during delivery:**  **●** Observe engagement, affect, and attention continuously.  **●** Do NOT speak for the child, prompt answers, or confirm/deny any response.  **●** Use scaffold prompts (from the scenario script) only if the child does not respond after approximately 15 seconds.  **●** If a technical issue occurs: calmly say "Let's pause for a moment," resolve the issue, then resume. | |
| **◆ Did a technical or behavioural disruption occur?** | |
| **YES — Technical disruption**  1. Say calmly: "Let's pause for a moment."  2. Do not show frustration or alarm.  3. Wait for system recovery. Re-start chatbot prompt.  4. If unresolved after 2 min: log, skip to next prompt. | **YES — Child disengages or becomes distressed**  1. Gently redirect: "Let's try again. What do you think?"  2. If distress continues: pause session, offer reassurance.  3. Resume only when child is ready and willing.  4. Log the incident in Section H of the fidelity checklist. |
| **▼ Scenario complete** | |
| **STEP 3 — Session Closing (2 min)** | |
| Chatbot delivers its closing statement by voice.  **Facilitator affirms the child's effort warmly:** *"You did such careful thinking today."*  Return child to classroom. Do not discuss responses with teachers or peers. | |
| **▼ Child returns to class** | |
| **POST-SESSION (complete before your next session)** | |
| **✓** Complete all fields of the Session Fidelity Checklist (S3).  **✓** Record field observation notes: notable child responses, spontaneous comments, engagement patterns.  **✓** Log any technical disruptions: nature, duration, and impact on session flow.  **✓** Log any scaffold instances: which prompt, which level of support used.  **✓** Ensure no session content is discussed with classroom teachers, parents, or peers. | |

# **Situational Decision Guide**

Facilitator guidance for specific situations that may arise during any session. Column 3 (in red) specifies prohibited actions to prevent inadvertent bias or fidelity violations.

| **Situation** | **What to do** | **What NOT to do** | **Log in checklist?** |
| --- | --- | --- | --- |
| **Child does not speak after chatbot prompt (15 s)** | Deliver the scenario-specific scaffold prompt from S1. Wait 10 more seconds. If still no response, move to the next prompt. | Do not speak the answer or lead the child toward any emotion or perspective. | Yes — note prompt and scaffold level |
| **Child gives a very short or off-topic answer** | Accept it. Allow the chatbot to process and continue. Use a scaffold only if the chatbot explicitly loops back. | Do not ask the child to try again or rephrase unless chatbot indicates non-recognition. | Optional |
| **Chatbot does not recognise child speech (voice error)** | Calmly ask the child to repeat: "Can you say that again a little louder?" If repeated errors, note and continue. | Do not interpret or speak the child's words into the device on their behalf. | Yes — note frequency |
| **Child becomes upset or distressed** | Pause the session. Say: "Let's take a little break." Offer reassurance. Resume only if child is willing. | Do not pressure the child to continue. Do not minimise their feelings. | Yes — mandatory (Section H) |
| **Internet disconnects mid-session** | Say calmly: "Let's wait a moment." Attempt reconnection. Resume from the last prompt. If > 2 min: log and skip to next. | Do not express frustration. Do not leave child unattended. | Yes — note duration |
| **Child asks "Is that right?" or seeks confirmation** | Say: "There's no right or wrong answer — I want to hear what YOU think." Smile reassuringly. | Do not confirm or deny any response as correct or incorrect. | Optional |
| **Child asks about the chatbot ("Is it a robot?")** | Respond simply: "It's a kind of computer that tells stories. What do you think about it?" Allow exploration. | Do not dismiss the question. Do not over-explain AI technology. | Optional — may be analytically rich |
| **Session runs over 25 minutes** | Begin closing sequence immediately. Prioritise the closing step even if the final scenario prompt is incomplete. | Do not rush through earlier steps to compensate for lost time. | Yes — record actual duration |

# **Scaffolding Ladder**

Scaffolding must be delivered in level order. Do not skip levels or apply Level 3+ support before exhausting lower levels.

| **Level** | **When to use** | **Facilitator language** | **Purpose** |
| --- | --- | --- | --- |
| **1** | Child does not respond within 15 s of chatbot prompt | "Take your time — what do you think?" [Pause 10 more seconds] | Extend wait time before any facilitator support is given |
| **2** | Still no response after extended wait | Read the scenario-specific scaffold prompt (from S1) aloud | Provide the lowest possible cue without leading toward any answer |
| **3** | Scaffold prompt produces no response | "That's completely fine. Let's keep going." [Allow chatbot to continue] | Honour the child's pace; remove pressure entirely |
| **4** | Child appears confused by the scenario narrative itself | "Let me listen to that part again with you." [Allow chatbot to re-read if supported, or re-state the scenario in neutral terms] | Clarify context without introducing emotional content |
| **5** | Child is visibly anxious, withdrawing, or distressed | "Would you like to take a little break? We can stop whenever you want." | Prioritise emotional safety above session completion at all times |

# **Key Principles**

- Child–chatbot primacy: The child interacts directly with the chatbot by voice. The facilitator does not mediate this communication.
- Neutrality: The facilitator never suggests, confirms, or denies any response. The child's own words are the only valid input.
- Patience: A 15-second wait is the minimum before any scaffold is offered. Silence is acceptable.
- Safety: If a child shows distress, the session pauses immediately. There is no pressure to resume.
- Fidelity: Every deviation from the standard flow — however minor — must be logged in the checklist (S3).
- Confidentiality: No child response is discussed with teachers, parents, or peers.
- Documentation: The observation log is completed immediately after each session, not retrospectively.
