# Supplementary material
Source: Research Square preprint supplement (doi:10.21203/rs.3.rs-8991408/v1)
Supplement: Supplementary file 1 [file 05ed1a70e940e99193cd44b3.xlsx]

## Sheet: EBAT (Cognitive)
EBAT — Cognitive Perspective-Taking (Bilişsel Bakış Açısı Alma)
		PRETEST (Ön Test)																	POSTTEST (Son Test)
No	Child	Q1	Q2	Q3	Q4	Q5	Q6	Q7	Q8	Q9	Q10	Q11	Q12	Q13	Q14	Q15	Total	→	Q1	Q2	Q3	Q4	Q5	Q6	Q7	Q8	Q9	Q10	Q11	Q12	Q13	Q14	Q15	Total	Δ
1	P01	0	0	1	0	0	0	0	0	1	0	1	0	0	1	0	4		1	0	1	1	1	1	1	1	0	0	1	1	1	1	1	12	+8
2	P02	0	1	0	1	1	1	0	0	1	0	1	0	0	0	0	6		0	1	1	1	0	1	1	1	1	1	1	1	1	1	1	13	+7
3	P03	1	0	1	0	0	1	0	0	1	1	1	1	1	1	0	9		1	1	1	1	1	1	1	1	1	1	1	1	1	1	1	15	+6
4	P04	1	0	1	0	0	1	0	1	0	0	0	0	1	0	0	5		1	0	1	1	1	1	1	1	0	1	1	1	1	1	1	13	+8
5	P05	0	0	1	0	0	1	1	1	1	0	1	1	1	1	0	9		1	1	1	1	1	1	1	1	1	1	1	1	1	1	1	15	+6
6	P06	0	0	1	0	0	0	0	0	1	0	0	0	1	0	0	3		0	1	1	1	1	1	1	1	1	1	1	0	1	0	1	12	+9
7	P07	1	1	1	0	1	1	1	0	1	1	1	1	1	1	1	13		1	1	1	1	1	1	1	1	1	1	1	1	1	1	1	15	+2
8	P08	0	0	0	0	0	1	0	1	0	0	0	0	0	1	0	3		0	0	0	1	1	1	0	1	0	1	1	1	0	1	1	9	+6
9	P09	0	1	1	1	0	1	0	1	0	1	1	1	1	1	0	10		1	1	1	1	1	1	1	1	1	1	1	1	1	1	1	15	+5
10	P10	1	0	1	0	0	0	1	1	0	0	0	0	1	0	1	6		1	0	1	1	1	1	1	1	1	1	1	1	1	1	1	14	+8
11	P11	0	0	1	0	0	0	1	0	0	0	0	1	0	0	0	3		1	0	1	0	1	0	1	1	1	1	0	1	1	1	0	10	+7
12	P12	1	0	1	0	0	1	1	1	0	0	1	1	1	1	1	10		1	1	0	1	0	1	0	1	1	1	1	0	1	1	1	11	+1
13	P13	1	0	0	0	0	1	0	0	0	0	0	0	0	1	0	3		0	0	0	1	1	1	0	1	0	1	1	1	0	1	1	9	+6
14	P14	1	1	1	0	1	1	1	0	1	0	1	1	1	1	1	12		0	1	1	1	1	1	1	1	1	1	1	0	1	0	1	12	0
15	P15	1	0	1	0	0	1	0	1	0	0	0	0	1	0	0	5		1	1	0	1	1	1	1	1	1	1	1	1	1	1	1	14	+9
	Mean (M)																6.73																	12.60
	SD																3.47																	2.13
	Median																6.0																	13.0
	IQR																3.5–9.5																	11.5–14.5

## Sheet: EDAT (Emotional)
EDAT — Emotional Perspective-Taking (Duygusal Bakış Açısı Alma)
		PRETEST (Ön Test)															POSTTEST (Son Test)
No	Child	Q1	Q2	Q3	Q4	Q5	Q6	Q7	Q8	Q9	Q10	Q11	Q12	Q13	Total	→	Q1	Q2	Q3	Q4	Q5	Q6	Q7	Q8	Q9	Q10	Q11	Q12	Q13	Total	Δ
1	P01	1	0	1	0	1	1	0	1	1	1	1	0	0	8		1	1	1	1	1	1	1	1	1	1	1	1	1	13	+5
2	P02	1	1	1	1	1	1	0	1	0	1	0	1	0	9		1	1	1	1	1	1	1	1	1	1	1	1	1	13	+4
3	P03	1	0	1	1	1	1	0	0	1	1	1	1	1	10		1	1	1	1	1	1	1	0	1	1	1	1	1	12	+2
4	P04	0	1	1	0	0	1	1	1	1	0	0	1	1	8		1	1	1	1	1	1	1	1	1	1	1	1	1	13	+5
5	P05	1	1	1	0	1	1	1	0	1	1	0	1	0	9		1	1	1	1	1	1	1	1	1	1	1	1	1	13	+4
6	P06	1	0	1	1	1	0	1	1	0	1	1	1	1	10		1	1	1	1	1	0	1	1	1	1	1	1	1	12	+2
7	P07	0	1	1	0	1	1	0	1	0	1	0	1	0	7		1	1	1	0	1	1	1	1	1	1	1	1	1	12	+5
8	P08	0	0	1	0	0	1	0	1	0	1	0	1	0	5		0	1	1	1	1	1	1	1	1	1	1	1	1	12	+7
9	P09	1	0	1	0	1	1	0	1	1	1	0	1	0	8		1	1	1	0	1	1	1	1	1	1	1	1	1	12	+4
10	P10	1	1	1	0	1	0	1	1	0	1	1	0	1	9		1	1	1	1	1	1	1	1	1	1	1	1	1	13	+4
11	P11	1	0	1	0	0	1	0	1	1	1	0	1	0	7		1	1	1	1	1	1	1	1	1	1	0	1	1	12	+5
12	P12	1	1	1	0	0	1	0	1	0	1	1	1	0	8		1	1	1	0	1	1	1	1	1	1	1	1	1	12	+4
13	P13	1	1	0	1	0	1	1	1	1	1	0	1	1	10		1	1	1	0	1	0	1	1	1	1	1	1	1	11	+1
14	P14	1	0	1	0	1	1	0	0	1	1	1	1	1	9		1	1	1	0	1	1	1	1	1	1	1	1	1	12	+3
15	P15	1	0	1	1	1	0	0	0	1	1	1	1	1	9		1	1	1	1	1	0	1	1	1	1	1	1	1	12	+3
	Mean (M)														8.40															12.27
	SD														1.35															0.59
	Median														9.0															12.0
	IQR														8.0–9.0															12.0–13.0

## Sheet: Statistical Summary
Statistical Summary — Pretest–Posttest Outcomes (N = 15)
Statistic	EBAT Pre	EBAT Post	EDAT Pre	EDAT Post
Mean (M)	6.73	12.6	8.4	12.27
SD	3.47	2.13	1.35	0.59
Median	6	13	9	12
IQR (Q1–Q3)	3.5–9.5	11.5–14.5	8.0–9.0	12.0–13.0
Min	3	9	5	11
Max	13	15	10	13
N at ceiling	—	4 (26.7%)	—	5 (33.3%)
N ≥ ceiling−1	—	9 (60.0%)	—	14 (93.3%)
Inferential Results (Primary Analyses)
Measure	Test Statistic	p (Holm-adj)	Mean Change (95% CI)	Hedges' g (95% CI)
EBAT (Cognitive)	V = 105	< .001	5.87 [4.32, 7.42]	1.98 [1.27, 5.02]
EDAT (Emotional)	V = 120	< .001	3.87 [3.03, 4.70]	2.43 [1.77, 4.33]
Shapiro–Wilk Normality Test on Paired Differences
Measure	W	p-value	Normal?	Primary Test Used
EBAT differences	.865	.028	No (p < .05)	Wilcoxon signed-rank
EDAT differences	.945	.450	Yes (p ≥ .05)	Wilcoxon signed-rank (for consistency)
Spearman Correlations Between EBAT and EDAT
Association			ρ	p-value
Pretest EBAT–EDAT			−.06	.832
Posttest EBAT–EDAT			.34	.213
EBAT Change–EDAT Change			−.02	.942
