# Supplementary material
Source: Research Square preprint supplement (doi:10.21203/rs.3.rs-8991408/v1)
Supplement: Supplementary file 3 [file c97ca3af60fc2bcdd436f81f.docx]

**SUPPLEMENTARY MATERIAL S3**

**Session Fidelity Checklist**

*AI-Driven Social–Emotional Learning: Enhancing Perspective-Taking Skills*

*Through Scenario-Based Chatbot Dialogues in Early Childhood*

# **Instructions for Use**

This checklist must be completed for **every** session delivered. Complete Sections A–I during or immediately after each session. Print one copy per session, or open the digital version before each session begins.

**Interaction model.** A voice-activated, web-based generative AI chatbot was used. The child interacted with the chatbot directly by voice. The facilitator was present for support, monitoring, and scaffolding but did not communicate on behalf of the child.

**Fidelity threshold.** Sessions are protocol-adherent when ≥85% of mandatory steps are completed as specified. The mean fidelity score across all 12 sessions is the programme-level fidelity estimate.

**Independent audit.** Approximately 10% of sessions (randomly selected) will be reviewed by an independent observer using this checklist. Discrepancies will be resolved through discussion.

| **Symbol / Colour** | **Meaning** | **Action required** | **Fidelity impact** |
| --- | --- | --- | --- |
| □ Empty checkbox | Step not yet completed | Tick or write N/A if not applicable | Unticked mandatory steps reduce fidelity score |
| ✓ Ticked checkbox | Step completed as specified | None — proceed | Counts toward adherent steps |
| Yellow background | Mandatory item | Must be completed every session | Omission is a protocol deviation |
| Red section header | Safety-critical section | Must be reviewed even if no issues | Non-completion is a reportable omission |

# **Per-Session Fidelity Checklist**

*Print or duplicate one copy of the form below for each of the 12 sessions.*

| **SECTION A — Administrative Information**  *Complete before beginning the session* | | |
| --- | --- | --- |
| **✓** | **Item** | **Response / Entry** |
|  | **Session Number (1–12)** | Session ____ |
|  | **Date** | ____ / ____ / ________ |
|  | **Child pseudonym** |  |
|  | **Facilitator name / ID** |  |
|  | **Scenario delivered this session** | Scenario ____ — |
|  | **Session start time / End time** | Start: ________ End: ________ |
|  | **Total session duration** | ____ min □ Within 20–25 min □ Outside range |
| **SECTION B — Pre-Session Setup**  *Tick each item before the child arrives* | | |
| **✓** | **Setup item** | **Notes (if any issue)** |
| **□** | **Stable internet connection confirmed; chatbot interface tested**  *Confirm voice output is working and device microphone is active* |  |
| **□** | **Device volume set to appropriate level for the room** |  |
| **□** | **Quiet, low-distraction environment set up**  *No other children present; door closed or area designated* |  |
| **□** | **Seating arranged: child faces device; facilitator sits to the side**  *Facilitator is present but not positioned between child and device* |  |
| **□** | **Scenario script (S1) reviewed for today's session**  *Narrative content, phase sequence, and scaffold prompts confirmed* |  |
| **□** | **Fidelity checklist ready (this form)** |  |
| **SECTION C — Scenario Delivery Fidelity**  *Complete during or immediately after the session* | | |
| **✓** | **Protocol step** | **Adherent? / Notes** |
| **□** | **Chatbot opened correctly; voice interaction initiated** |  |
| **□** | **Child engaged with chatbot directly by voice throughout**  *Facilitator did not speak for the child or enter responses on the child's behalf* |  |
| **□** | **No emotion, answer, or perspective was suggested or confirmed by facilitator** |  |
| **□** | **Wait time observed (≥15 s) before any scaffold was delivered** |  |
| **□** | **Scaffold used at most once per prompt, at the appropriate level (see S2 scaffold ladder)** |  |
| **□** | **Narrative sequence followed as scripted**  *No scenario steps skipped or reordered* |  |
| **□** | **Prosocial repair step completed ("What would you do?")** |  |
| **□** | **Closing statement delivered by chatbot** |  |
| **Overall scenario adherence rating:**  *Deviation details: _______________________________________________________________* | | |
| **SECTION D — Technical Disruptions Log**  *Complete if any disruption occurred* | | |
| **Disruption type** | **Description & timing** | **Duration** | **Impact on session** |
| **Internet disconnection** | □ None □ Occurred: ________________________ | ____ min | □ None □ Minimal □ Moderate □ Session disrupted |
| **Voice recognition error / chatbot did not hear child** | □ None □ Occurred: ________________________ | ____ min | □ None □ Minimal □ Moderate □ Session disrupted |
| **Chatbot latency / slow response** | □ None □ Occurred: ________________________ | ____ min | □ None □ Minimal □ Moderate □ Session disrupted |
| **System error or freeze** | □ None □ Occurred: ________________________ | ____ min | □ None □ Minimal □ Moderate □ Session disrupted |
| **Other** | □ None □ Occurred: ________________________ | ____ min | □ None □ Minimal □ Moderate □ Session disrupted |
| **SECTION E — Child Engagement & Affective Observations**  *Record real-time observations; do not reconstruct from memory* | | |
| **Domain** | **Rating scale** | **Rating & notes / representative quote** |
| **Overall engagement level** | *1=Disengaged 2=Low 3=Moderate 4=High 5=Very high* | Rating: ____ Notes: ________________________________ |
| **Emotional affect** | *1=Distressed 2=Flat 3=Neutral 4=Positive 5=Highly positive* | Rating: ____ Notes: ________________________________ |
| **Spontaneous verbal participation** | *1=Silent 2=Prompted only 3=Occasional 4=Frequent 5=Proactive* | Rating: ____ Notes: ________________________________ |
| **Perspective-taking attempts** | *1=None 2=Minimal 3=Partial 4=Adequate 5=Rich & unprompted* | Rating: ____ Notes: ________________________________ |
| **Prosocial solution quality** | *1=None 2=Minimal 3=One adequate 4=Multiple 5=Creative & empathic* | Rating: ____ Notes: ________________________________ |
| **Attention continuity** | *1=Fragmented 2=Intermittent 3=Moderate 4=Sustained 5=Consistent* | Rating: ____ Notes: ________________________________ |
| **SECTION F — Scaffold Use Log**  *Record each instance a scaffold prompt was delivered* | | |
| **Scenario phase** | **Scaffold level used (1–5)** | **Child response after scaffold** |
| Phase: ____________________ | Level: 1 / 2 / 3 / 4 / 5 |  |
| Phase: ____________________ | Level: 1 / 2 / 3 / 4 / 5 |  |
| Phase: ____________________ | Level: 1 / 2 / 3 / 4 / 5 |  |
| Phase: ____________________ | Level: 1 / 2 / 3 / 4 / 5 |  |
| Phase: ____________________ | Level: 1 / 2 / 3 / 4 / 5 |  |
| **SECTION G — Safety, Welfare & Adverse Events**  *MANDATORY for every session* | | |
| **✓** | **Item** | **Yes / No / Notes** |
| **□** | **No signs of distress observed throughout the session**  *If distress occurred, describe in the notes column and complete fields below* |  |
| **□** | **No adverse events occurred**  *Adverse event = sustained negative emotional reaction, refusal, or emotional escalation* |  |
| **□** | **Child completed the session without requesting to stop**  *If session ended early at child's request, document reason in notes* |  |
| **□** | **Session ended within 25 minutes** |  |
| **If any adverse event occurred, complete the following (mandatory):**  *Nature of event: _______________________________________________________________*  *Action taken: __________________________________________________________________*  Principal investigator notified? □ Yes □ No □ N/A | | |
| **SECTION H — Overall Session Fidelity Rating** | | |
| Estimated % adherence: _____ *(Completed mandatory steps ÷ total mandatory steps × 100)*  *Primary reason for any non-adherence: __________________________________________*  Facilitator signature: ___________________________ Date: _______________ | | |
| **SECTION I — Qualitative Field Notes**  *Write immediately after the session; minimum 3–5 lines* | | |
| **Notable behaviours, quotes, or emotional responses during the scenario:**  ______________________________________________________________  ______________________________________________________________  ______________________________________________________________  ______________________________________________________________  ______________________________________________________________  **Spontaneous comments before or after the session:**  ______________________________________________________________  ______________________________________________________________  ______________________________________________________________  **Observations relevant to future sessions or protocol adjustment:**  ______________________________________________________________  ______________________________________________________________  ______________________________________________________________ | | |

# **Programme-Level Fidelity Summary Sheet**

Transfer key information from each per-session checklist into this summary sheet after each session.

| **Ses.** | **Date** | **Child** | **Facilitator** | **Duration** | **Adherence?** | **Scaffold Instances** | **Disruptions** | **Adverse Event?** | **Fidelity %** | **Reviewer?** |
| --- | --- | --- | --- | --- | --- | --- | --- | --- | --- | --- |
| **1** |  |  |  |  |  |  |  |  |  |  |
| **2** |  |  |  |  |  |  |  |  |  |  |
| **3** |  |  |  |  |  |  |  |  |  |  |
| **4** |  |  |  |  |  |  |  |  |  |  |
| **5** |  |  |  |  |  |  |  |  |  |  |
| **6** |  |  |  |  |  |  |  |  |  |  |
| **7** |  |  |  |  |  |  |  |  |  |  |
| **8** |  |  |  |  |  |  |  |  |  |  |
| **9** |  |  |  |  |  |  |  |  |  |  |
| **10** |  |  |  |  |  |  |  |  |  |  |
| **11** |  |  |  |  |  |  |  |  |  |  |
| **12** |  |  |  |  |  |  |  |  |  |  |
| **MEAN FIDELITY ACROSS ALL 12 SESSIONS:** | | | | | | | | | **_____%** | **□ ≥85%** |

# **Fidelity Calculation Guide**

| **Component** | **How to calculate** | **Threshold** |
| --- | --- | --- |
| **Session-level fidelity** | Completed mandatory items ÷ total mandatory items × 100 | ≥85% per session |
| **Programme-level fidelity** | Mean of all 12 session-level fidelity scores | ≥85% overall |
| **Delivery completeness** | Sessions fully delivered ÷ 12 × 100 | 100% target |
| **Scaffold appropriateness** | Scaffold instances at correct level ÷ total scaffold instances × 100 | ≥85% |
| **Adverse event rate** | Number of adverse events ÷ 12 × 100 | 0% target; any event = mandatory report |
