# Supplementary material
Source: Research Square preprint supplement (doi:10.21203/rs.3.rs-8991408/v1)
Supplement: Supplementary file 4 [file d75b3d65883fba315d6b166f.docx]

**SUPPLEMENTARY MATERIAL S1**

**Intervention Scenario Scripts**

*AI-Driven Social–Emotional Learning: Enhancing Perspective-Taking Skills*

*Through Scenario-Based Chatbot Dialogues in Early Childhood*

# **Overview**

This document contains the twelve scenario scripts used across the 12-session intervention. One scenario was delivered per session, progressing from simpler social-emotional contexts (basic emotion recognition, inclusion) to increasingly complex ones (intentionality, self-regulation, trust, loss and transition).

| **Interaction model**  A voice-activated, web-based generative AI chatbot (in Turkish) was used. The chatbot communicated with the child directly through voice output. The child responded by speaking aloud to the chatbot. The facilitator was present throughout each session to provide support, monitor engagement and safety, and deliver scaffolding when needed — but was not the communication channel between child and chatbot.  *Column 2 of each script (🔊 Chatbot speaks) shows what the chatbot says aloud to the child.* |
| --- |

**This document.** Scenario 1 is provided as a fully worked example showing the complete turn-by-turn script. Scenarios 2–12 are provided as titled structural shells with their theme, SEL objective, and suggested phase sequence, to be completed following the same format.

# **Scenario Progression Overview**

| **S#** | **Ses.** | **Title** | **Theme** | **Target Skill** | **Complexity** | **Worked?** |
| --- | --- | --- | --- | --- | --- | --- |
| **1** | **1** | The New Friend | Inclusion & Loneliness | Emotion recognition + prosocial action | Low | ✓ Full |
| **2** | **2** | The Broken Toy | Misunderstanding & Apology | Dual-perspective; intentionality | Low | Shell |
| **3** | **3** | The Shared Snack | Fairness & Generosity | Fairness values; disappointment | Low–Med | Shell |
| **4** | **4** | The Surprise Party | Intentions & Consequences | Three-perspective; behaviour–meaning | Medium | Shell |
| **5** | **5** | The Painting That Got Torn | Emotional Regulation & Forgiveness | Regulation strategy; attribution | Medium | Shell |
| **6** | **6** | Left Out of the Game | Inclusion & Social Advocacy | Witness perspective; systemic repair | Medium | Shell |
| **7** | **7** | The Mixed-Up Message | Miscommunication & Clarification | Ambiguity; clarification; repair | Med–High | Shell |
| **8** | **8** | The Too-Loud Voice | Self-Regulation & Social Awareness | Self-monitoring; social impact | Med–High | Shell |
| **9** | **9** | The Forgotten Invitation | Hurt Feelings & Intentionality | Attribution; empathic inquiry | High | Shell |
| **10** | **10** | The Different Idea | Perspective Differences & Compromise | Competing views; compromise | High | Shell |
| **11** | **11** | The Broken Promise | Trust & Repair | Attribution; forgiveness; repair | High | Shell |
| **12** | **12** | The Last Day | Loss, Change & Transition | Mixed emotions; reframing | High | Shell |

# **Scenario 1 — Fully Worked Example**

| **SCENARIO 1** The New Friend  Theme: Inclusion & Loneliness  Target skill: Recognising sadness/loneliness; prosocial response generation | Session: 1 | | | |
| --- | --- | --- | --- |
| **SEL Objective:** Child identifies a peer's loneliness from a brief narrative, connects it to personal experience, and generates a prosocial inclusion response. | | | |
| **Phase** | **Chatbot speaks (voice output to child)** | **Facilitator note** | **Scaffold if child does not respond (≥15 s)** |
| **Opening** | 🔊 Hello! Today I have a lovely story to share with you. Are you ready? | Chatbot greets the child directly by voice. Facilitator observes the child's engagement and readiness. If the child seems uncertain, facilitator may quietly say "Go ahead, you can answer." | *"We are going to listen to a wonderful story together. Are you ready?"* |
| **Narrative** | 🔊 Let me tell you about Elif. Elif started at a brand-new school today. At recess, everyone ran off to play. But Elif did not know anyone yet. She stood alone by the wall and looked down at her shoes. | Chatbot narrates at a measured pace. Facilitator observes the child's face for recognition or empathy cues. No action required unless child attempts to speak before the chatbot finishes. | *—* |
| **Emotion Inference** | 🔊 How do you think Elif feels? | Chatbot pauses and awaits the child's spoken response. Facilitator does not prompt, suggest, or confirm any emotion. If child says something unexpected, allow the chatbot to continue responding to it naturally. | *"Everyone is playing but Elif is alone. How might someone feel in a moment like that?"* |
| **Why?** | 🔊 Why do you think she feels that way? | Chatbot prompts causal reasoning. Facilitator listens and observes. Note whether the child references the absence of friends or the experience of being new. | *"Nobody called her to join the game. How might that make someone feel?"* |
| **Self- Connection** | 🔊 Have you ever felt like this? Lonely, or left out of a game? | Chatbot invites personal connection. Accept any answer, including "No." One child observed to say: "She might feel lonely, but sometimes I also like to play on my own" — allow and value nuanced responses. | *"Sometimes when our friends are not around we feel sad. Has something like that ever happened to you?"* |
| **Prosocial Repair** | 🔊 If you had been at that recess and seen Elif, what would you have done? | Core prosocial response step. Chatbot pauses for child's spoken answer. Facilitator does NOT suggest any action. Observed responses: "I would play with her," "I would invite her to the game," "I would be her friend," "I would make her laugh and cheer her up," "I would go to her side." | *"Would you have said something to her? What would you have done?"* |
| **Outcome Prediction** | 🔊 If you had done that, how do you think Elif would have felt? | Chatbot reflects the child's suggestion back and asks for an outcome prediction. Child predicts the emotional effect of their own prosocial action. | *"Would she still feel sad, or would she start to feel a little better?"* |
| **Closing** | 🔊 What a wonderful thought! Reaching out to someone who feels lonely makes them feel both happy and special. You are a truly good friend. Thank you! | Chatbot delivers closing affirmation by voice. Facilitator observes any spontaneous follow-up comments from the child — these may be analytically valuable and should be noted in the observation log. | *—* |
| **Target response(s):** "Sad," "lonely," "bad," "unhappy," or equivalent for the emotion step. Prosocial action: "I would go to her," "I would invite her to the game," "I would play with her," "I would be her friend," "I would make her laugh." Any inclusive, other-oriented suggestion is accepted. | | | |

# **Scenarios 2–12 — Structure Templates**

Each scenario below is provided with its title, theme, SEL objective, and suggested phase sequence. Full script content should be developed following the structure of Scenario 1.

## **Scenario 2**

| **SCENARIO 2** The Broken Toy  Theme: Misunderstanding & Apology  Target skill: Dual-perspective reasoning; intentionality judgement; apology | Session: 2 | | | |
| --- | --- | --- | --- |
| **SEL Objective:** Child distinguishes between accidental and intentional harm, holds two simultaneous emotional perspectives, and generates an apology and repair. | | | |
| **Phase** | **Chatbot speaks (voice output to child)** | **Facilitator note** | **Scaffold if child does not respond (≥15 s)** |
| *Content to be developed following the structure of Scenario 1.*  **Suggested phases:** *Opening → Narrative → Emotion Inference → Why? → Perspective-Taking → Prosocial Repair → Outcome Prediction → Closing* | | | |

## **Scenario 3**

| **SCENARIO 3** The Shared Snack  Theme: Fairness & Generosity  Target skill: Fairness values; recognising disappointment; generous sharing | Session: 3 | | | |
| --- | --- | --- | --- |
| **SEL Objective:** Child reasons about fairness in resource distribution, recognises another's disappointment, and models a generous sharing response. | | | |
| **Phase** | **Chatbot speaks (voice output to child)** | **Facilitator note** | **Scaffold if child does not respond (≥15 s)** |
| *Content to be developed following the structure of Scenario 1.*  **Suggested phases:** *Opening → Narrative → Emotion Inference → Why? → Perspective-Taking → Prosocial Repair → Outcome Prediction → Closing* | | | |

## **Scenario 4**

| **SCENARIO 4** The Surprise Party  Theme: Intentions & Consequences  Target skill: Three-perspective reasoning; behaviour-meaning gap | Session: 4 | | | |
| --- | --- | --- | --- |
| **SEL Objective:** Child understands that identical behaviour can carry different meanings depending on intent, and reasons across a three-way perspective shift. | | | |
| **Phase** | **Chatbot speaks (voice output to child)** | **Facilitator note** | **Scaffold if child does not respond (≥15 s)** |
| *Content to be developed following the structure of Scenario 1.*  **Suggested phases:** *Opening → Narrative → Emotion Inference → Why? → Perspective-Taking → Prosocial Repair → Outcome Prediction → Closing* | | | |

## **Scenario 5**

| **SCENARIO 5** The Painting That Got Torn  Theme: Emotional Regulation & Forgiveness  Target skill: Emotion regulation strategy; causal attribution; repair | Session: 5 | | | |
| --- | --- | --- | --- |
| **SEL Objective:** Child names the emotions of both characters, identifies a self-regulation strategy, and proposes a repair after an emotionally reactive moment. | | | |
| **Phase** | **Chatbot speaks (voice output to child)** | **Facilitator note** | **Scaffold if child does not respond (≥15 s)** |
| *Content to be developed following the structure of Scenario 1.*  **Suggested phases:** *Opening → Narrative → Emotion Inference → Why? → Perspective-Taking → Prosocial Repair → Outcome Prediction → Closing* | | | |

## **Scenario 6**

| **SCENARIO 6** Left Out of the Game  Theme: Inclusion & Social Advocacy  Target skill: Witness perspective; systemic repair; advocacy behaviour | Session: 6 | | | |
| --- | --- | --- | --- |
| **SEL Objective:** Child recognises social exclusion from a witness perspective, generates advocacy behaviour, and proposes a systemic repair that includes the excluded peer. | | | |
| **Phase** | **Chatbot speaks (voice output to child)** | **Facilitator note** | **Scaffold if child does not respond (≥15 s)** |
| *Content to be developed following the structure of Scenario 1.*  **Suggested phases:** *Opening → Narrative → Emotion Inference → Why? → Perspective-Taking → Prosocial Repair → Outcome Prediction → Closing* | | | |

## **Scenario 7**

| **SCENARIO 7** The Mixed-Up Message  Theme: Miscommunication & Clarification  Target skill: Ambiguity recognition; clarification request; repair | Session: 7 | | | |
| --- | --- | --- | --- |
| **SEL Objective:** Child recognises that the same words can mean different things to different people, identifies the resulting misunderstanding, and proposes a clarifying repair. | | | |
| **Phase** | **Chatbot speaks (voice output to child)** | **Facilitator note** | **Scaffold if child does not respond (≥15 s)** |
| *Content to be developed following the structure of Scenario 1.*  **Suggested phases:** *Opening → Narrative → Emotion Inference → Why? → Perspective-Taking → Prosocial Repair → Outcome Prediction → Closing* | | | |

## **Scenario 8**

| **SCENARIO 8** The Too-Loud Voice  Theme: Self-Regulation & Social Awareness  Target skill: Self-monitoring; social impact awareness; self-correction | Session: 8 | | | |
| --- | --- | --- | --- |
| **SEL Objective:** Child identifies how unregulated behaviour can affect others, takes the peer's perspective, and generates a self-corrective strategy. | | | |
| **Phase** | **Chatbot speaks (voice output to child)** | **Facilitator note** | **Scaffold if child does not respond (≥15 s)** |
| *Content to be developed following the structure of Scenario 1.*  **Suggested phases:** *Opening → Narrative → Emotion Inference → Why? → Perspective-Taking → Prosocial Repair → Outcome Prediction → Closing* | | | |

## **Scenario 9**

| **SCENARIO 9** The Forgotten Invitation  Theme: Hurt Feelings & Intentionality  Target skill: Attribution; empathic inquiry; distinguishing accident from intent | Session: 9 | | | |
| --- | --- | --- | --- |
| **SEL Objective:** Child distinguishes between being deliberately excluded and accidentally forgotten, reasons about intent, and decides how to respond. | | | |
| **Phase** | **Chatbot speaks (voice output to child)** | **Facilitator note** | **Scaffold if child does not respond (≥15 s)** |
| *Content to be developed following the structure of Scenario 1.*  **Suggested phases:** *Opening → Narrative → Emotion Inference → Why? → Perspective-Taking → Prosocial Repair → Outcome Prediction → Closing* | | | |

## **Scenario 10**

| **SCENARIO 10** The Different Idea  Theme: Perspective Differences & Compromise  Target skill: Holding competing preferences; legitimising both views; compromise | Session: 10 | | | |
| --- | --- | --- | --- |
| **SEL Objective:** Child holds two conflicting preferences simultaneously, validates both perspectives as legitimate, and constructs a compromise solution. | | | |
| **Phase** | **Chatbot speaks (voice output to child)** | **Facilitator note** | **Scaffold if child does not respond (≥15 s)** |
| *Content to be developed following the structure of Scenario 1.*  **Suggested phases:** *Opening → Narrative → Emotion Inference → Why? → Perspective-Taking → Prosocial Repair → Outcome Prediction → Closing* | | | |

## **Scenario 11**

| **SCENARIO 11** The Broken Promise  Theme: Trust & Repair  Target skill: Attribution; forgiveness; trust-repair strategies | Session: 11 | | | |
| --- | --- | --- | --- |
| **SEL Objective:** Child reasons about why a promise was broken, distinguishing inability from unwillingness, identifies the emotional impact, and generates a trust-repair response. | | | |
| **Phase** | **Chatbot speaks (voice output to child)** | **Facilitator note** | **Scaffold if child does not respond (≥15 s)** |
| *Content to be developed following the structure of Scenario 1.*  **Suggested phases:** *Opening → Narrative → Emotion Inference → Why? → Perspective-Taking → Prosocial Repair → Outcome Prediction → Closing* | | | |

## **Scenario 12**

| **SCENARIO 12** The Last Day  Theme: Loss, Change & Transition  Target skill: Mixed emotions; acceptance; positive reframing | Session: 12 | | | |
| --- | --- | --- | --- |
| **SEL Objective:** Child identifies mixed emotions around endings and transitions, validates another character's sadness, and generates a hopeful, forward-looking prosocial response. | | | |
| **Phase** | **Chatbot speaks (voice output to child)** | **Facilitator note** | **Scaffold if child does not respond (≥15 s)** |
| *Content to be developed following the structure of Scenario 1.*  **Suggested phases:** *Opening → Narrative → Emotion Inference → Why? → Perspective-Taking → Prosocial Repair → Outcome Prediction → Closing* | | | |
